# Supplementary material for: Novel Cytochrome P450-3A4 Enzymatic Nanobiosensor for Lapatinib (a Breast Cancer Drug) Developed on a Poly(anilino-co-4-aminobenzoic Acid-Green-Synthesised Indium Nanoparticle) Platform
Source: MDPI journal article supplement (doi:10.3390/bios13090897), 2023-09-21
Supplement: s1 [file s1]

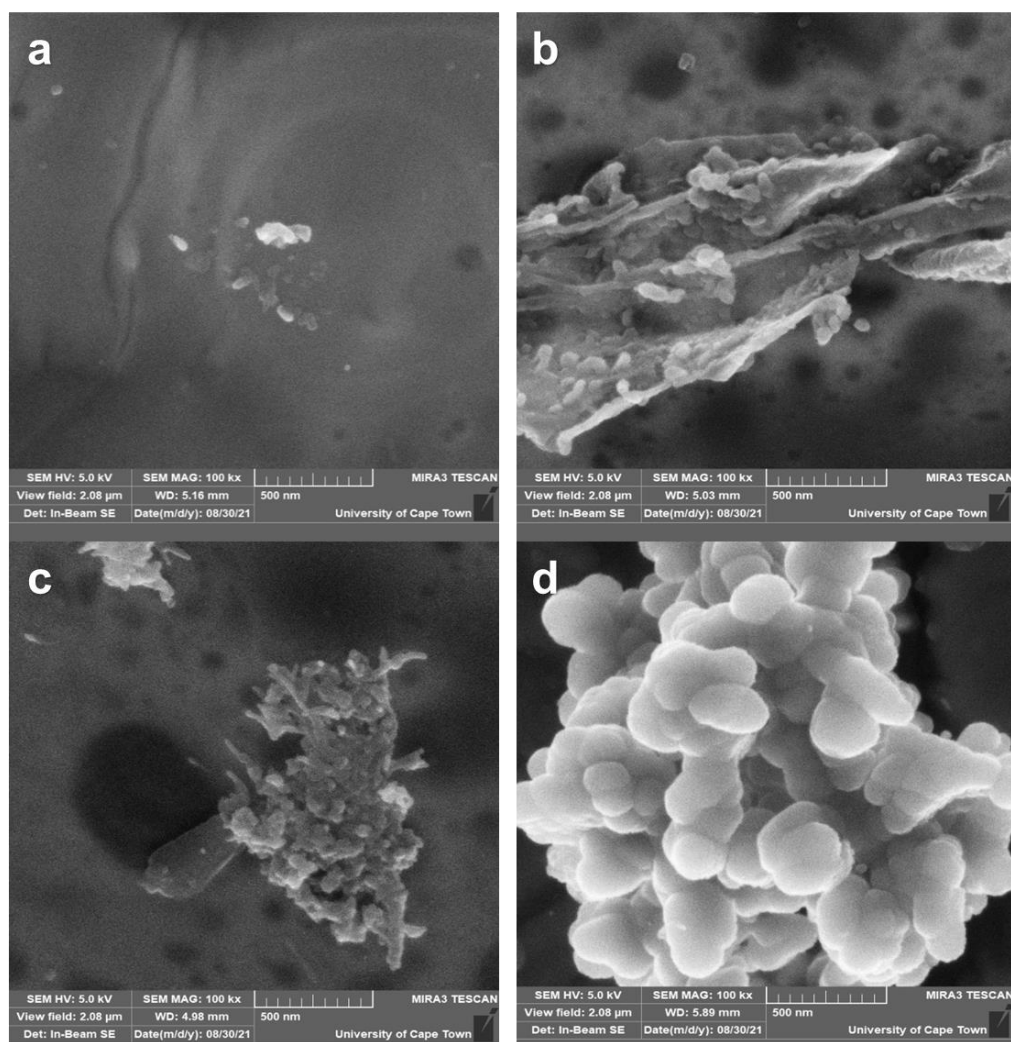

**Figure S1.** Scanning electron microscopy (SEM) analysis of green-synthesized indium nanoparticles in the time of: **(a)** 30 min, **(b)** 1 h, **(c)** 1.5 h and **(d)** 2 h.

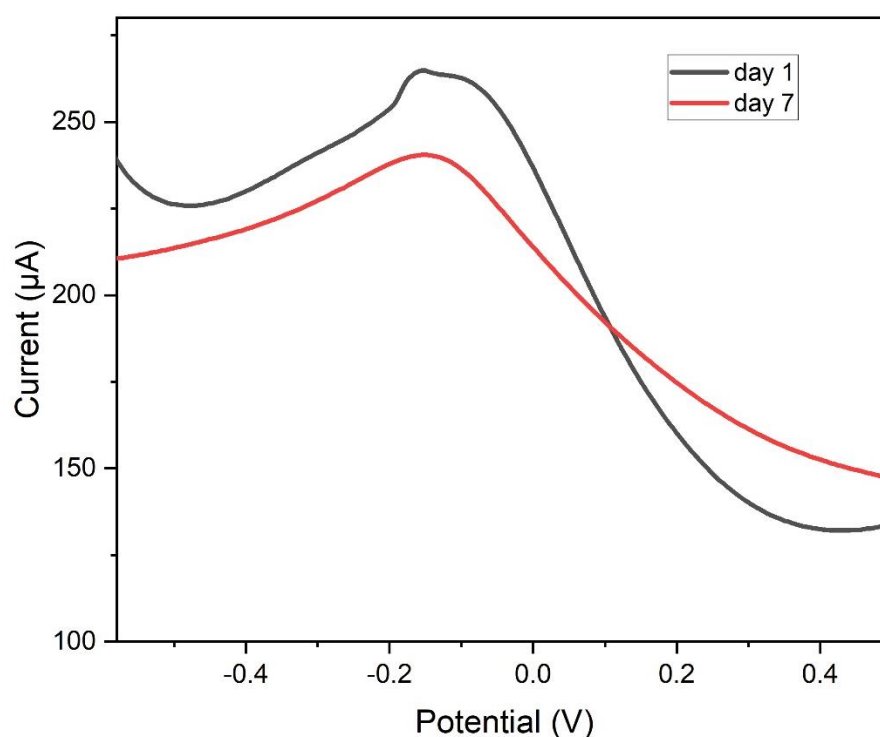

**Figure S2.** Stability studies: of the biosensor at day 1 and day 7 in DPBS at pH 7.2.

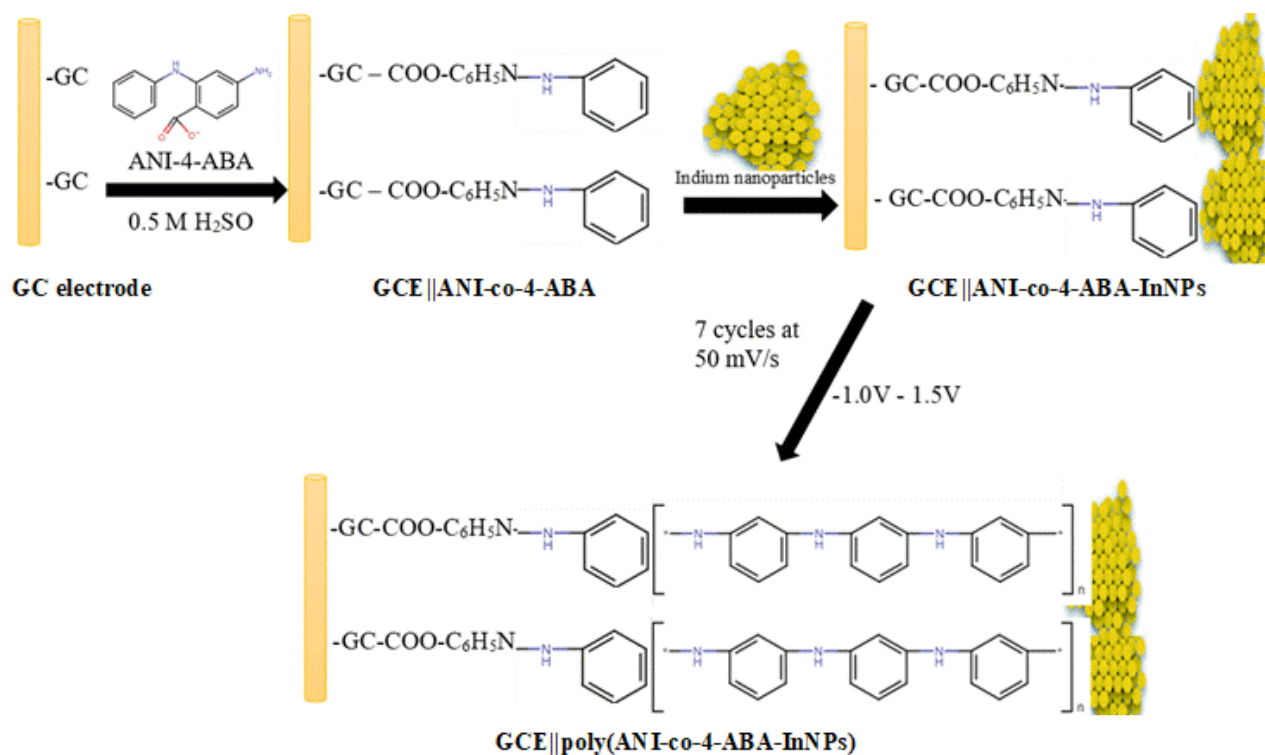

**Scheme S1.** Proposed schematic representation of ANI-4-ABA-InNPs polymerization on GC electrode to produce poly(ANI-co-4-ABA-InNPs).

**Table S1**, Depicting the stability studies of the SPCE||poly(ANI-co-4-ABA-InNPs)|CYP3A4 biosensor based on the peak current response.

|                                                                                                               | <b>Run 1<br/>(<math>\mu</math>A)</b> | <b>Run 2<br/>(<math>\mu</math>A)</b> | <b>Run 3<br/>(<math>\mu</math>A)</b> | <b>Average</b> | <b>Retained<br/>current</b> |
|---------------------------------------------------------------------------------------------------------------|--------------------------------------|--------------------------------------|--------------------------------------|----------------|-----------------------------|
| SPCE  poly(ANI-co-4-ABA-InNPs) CYP3A4                                                                         | 323                                  | 341                                  | 400                                  | 355            | 80.4%                       |
| SPCE  poly(ANI-co-4-ABA-InNPs) CYP3A4<br>stored at 4 °C in 10 mM<br>phosphate buffer solution for<br>one week | 486.7                                | 143.7                                | 240.4                                | 291.5          |                             |
